# Supplementary material for: Impact of modifiable reproductive factors on cancer incidence and mortality in Korea: a systematic review protocol
Source: HighWire-hosted journal article supplement (doi:10.1136/bmjopen-2022-067826), 2022-11-01
Supplement: bmjopen-2022-067826supp001_data_supplement.pdf [file bmjopen-2022-067826supp001_data_supplement.pdf]

## Supplementary appendix

## Appendix 1. Search strategy

Ovid MEDLINE(R) and Epub Ahead of Print, In-Process & Other Non-Indexed Citations, Daily and Versions(R) 1946 to July Week 2 2021

| #  | Searches                                                                                                                                                                                                      |
|----|---------------------------------------------------------------------------------------------------------------------------------------------------------------------------------------------------------------|
| 1  | (reproductive adj (factor* or characteristic* or histor*)).tw,kf.                                                                                                                                             |
| 2  | Milk, Human/ or Breast Feeding/ or (breast adj (feed* or milk)).tw,kf.                                                                                                                                        |
| 3  | Maternal Age/ or (age* adj (birth* or childbirth* or deliver* or parity or childbearing* or maternal or pregnanc* or mother* or first birth* or last birth* or first childbirth* or last childbirth*)).tw,kf. |
| 4  | Parity/ or Delivery, Obstetric/ or Pregnancy, Multiple/ or (((parity or pregnan* or child* or birth*) adj (histor* or number* or frequenc* or order*)) or nullipar* or multiparous or multiparit*).tw,kf.     |
| 5  | 1 or 2 or 3 or 4                                                                                                                                                                                              |
| 6  | exp Neoplasms/ or (cancer* or neoplas* or tumor* or malignan*).tw,kf.                                                                                                                                         |
| 7  | exp cohort studies/ or ((cohort adj (study or studies)) or cohort analy*).tw,kf.                                                                                                                              |
| 8  | (follow up adj (study or studies)).tw,kf.                                                                                                                                                                     |
| 9  | (longitudinal or prospective or retrospective).tw,kf.                                                                                                                                                         |
| 10 | 7 or 8 or 9                                                                                                                                                                                                   |
| 11 | korea*.mp.                                                                                                                                                                                                    |
| 12 | 5 and 6 and 10 and 11                                                                                                                                                                                         |

## EMBASE

| #   | Searches                                                                                                                                                                                                                                             |
|-----|------------------------------------------------------------------------------------------------------------------------------------------------------------------------------------------------------------------------------------------------------|
| #1  | (reproductive NEXT/1 (factor* OR characteristic* OR histor*)):ti,ab,kw                                                                                                                                                                               |
| #2  | 'breast milk'/exp OR 'breast feeding'/exp OR ((breast NEXT/1 (feed* OR milk)):ti,ab,kw)                                                                                                                                                              |
| #3  | 'maternal age'/exp OR ((age* NEXT/1 (birth* OR childbirth* OR deliver* OR parity OR childbearing* OR maternal OR pregnanc* OR mother* OR 'first birth*' OR 'last birth*' OR 'first childbirth*' OR 'last childbirth*')):ti,ab,kw)                    |
| #4  | 'parity'/exp OR 'obstetric delivery'/de OR 'multiple pregnancy'/de OR (((parity OR pregnan* OR child* OR birth*) NEXT/1 (histor* OR number* OR frequenc* OR order*)):ti,ab,kw) OR nullipar*:ti,ab,kw OR multiparous:ti,ab,kw OR multiparit*:ti,ab,kw |
| #5  | #1 OR #2 OR #3 OR #4                                                                                                                                                                                                                                 |
| #6  | 'neoplasm'/exp OR cancer*:ti,ab,kw OR neoplas*:ti,ab,kw OR tumor*:ti,ab,kw OR tumour*:ti,ab,kw OR malignan*:ti,ab,kw                                                                                                                                 |
| #7  | 'cohort analysis'/exp OR ((cohort NEXT/1 (study OR studies)):ti,ab,kw) OR 'cohort analy*':ti,ab,kw                                                                                                                                                   |
| #8  | ('follow up' NEXT/1 (study OR studies)):ti,ab,kw                                                                                                                                                                                                     |
| #9  | longitudinal:ti,ab,kw OR prospective:ti,ab,kw OR retrospective:ti,ab,kw                                                                                                                                                                              |
| #10 | #7 OR #8 OR #9                                                                                                                                                                                                                                       |
| #11 | korea:ti,ab,kw                                                                                                                                                                                                                                       |
| #12 | #5 AND #10 AND #11                                                                                                                                                                                                                                   |

## Cochrane Library

| #  | Searches                                                                                                                                                                                                                            |
|----|-------------------------------------------------------------------------------------------------------------------------------------------------------------------------------------------------------------------------------------|
| #1 | (reproductive next/1 (factor* or characteristic* or histor*)):ti,ab,kw                                                                                                                                                              |
| #2 | [mh ^"Milk, Human"] or [mh ^"Breast Feeding"] or (breast next/1 (feed* or milk)):ti,ab,kw                                                                                                                                           |
| #3 | [mh ^"Maternal Age"] or (age* next/1 (birth* or childbirth* or deliver* or parity or childbearing* or maternal or pregnanc* or mother* or "first birth*" or "last birth*" or "first childbirth*" or "last childbirth*")):ti,ab,kw   |
| #4 | [mh ^"Parity"] or [mh ^"Delivery, Obstetric"] or [mh ^"Pregnancy, Multiple"] or (((parity or pregnan* or child* or birth*) next/1 (histor* or number* or frequenc* or order*)) or nullipar* or multiparous or multiparit*):ti,ab,kw |

|     |                                                                                           |
|-----|-------------------------------------------------------------------------------------------|
| #5  | #1 or #2 or #3 or #4                                                                      |
| #6  | [mh "Neoplasms"] or (cancer* or neoplas* or tumor* or malignan*):ti,ab,kw                 |
| #7  | [mh "cohort studies"] or ((cohort next/1 (study or studies)) or "cohort analy*"):ti,ab,kw |
| #8  | (follow up next/1 (study or studies)):ti,ab,kw                                            |
| #9  | (longitudinal or prospective or retrospective):ti,ab,kw                                   |
| #10 | #7 or #8 or #9                                                                            |
| #11 | korea*:ti,ab,kw                                                                           |
| #12 | #5 and #6 and #10 and #11                                                                 |

## KoreaMED

| # | Searches                                                                                                                                                                                                                                                                                                                                                                                                                                                          |
|---|-------------------------------------------------------------------------------------------------------------------------------------------------------------------------------------------------------------------------------------------------------------------------------------------------------------------------------------------------------------------------------------------------------------------------------------------------------------------|
| 1 | "reproductive factor"[TIAB] OR "reproductive characteristic"[TIAB] OR "reproductive history"[TIAB] OR breastfeeding[TIAB] OR "breast feeding"[TIAB] OR parity[TIAB] OR delivery[TIAB] OR pregnant[TIAB] OR pregnancy[TIAB] OR pregnancies[TIAB] OR "age at menarche"[TIAB] OR "age at first birth"[TIAB] OR "age at last birth"[TIAB] OR "age at first birth"[TIAB] OR "age at last childbirth"[TIAB] OR "number of births"[TIAB] OR "number of childbirth"[TIAB] |
| 2 | cancer[TIAB] OR cancers[TIAB] OR tumor[TIAB] OR tumors[TIAB] OR tumour[TIAB] OR tumours[TIAB] OR neoplasm[TIAB] OR neoplasms[TIAB] OR neoplasia[TIAB] OR neoplasias[TIAB] OR malignant[TIAB] OR malignancy[TIAB] OR malignancies[TIAB]                                                                                                                                                                                                                            |
| 3 | cohort[TIAB] OR "follow up"[TIAB] OR longitudinal[TIAB] OR prospective[TIAB] OR retrospective[TIAB]                                                                                                                                                                                                                                                                                                                                                               |
| 4 | 1 AND 2 AND 3                                                                                                                                                                                                                                                                                                                                                                                                                                                     |

## Korean Medical Database (KMBASE)

| # | Searches                                                                                                                                                                                                                                                                                                                                 |
|---|------------------------------------------------------------------------------------------------------------------------------------------------------------------------------------------------------------------------------------------------------------------------------------------------------------------------------------------|
| 1 | (((((ALL=reproductive) OR [ALL=breastfeeding]) OR [ALL=breast feeding]) OR [ALL=birth*]) OR [ALL=생식]) OR [ALL=모유]) OR [ALL=수유]) OR [ALL=출산]) AND ((([ALL=cancer*] OR [ALL=tumor*]) OR [ALL=암]) OR [ALL=종양]) AND (((([ALL=cohort] OR [ALL=Follow up]) OR [ALL=longitudinal]) OR [ALL=prospective]) OR [ALL=retrospective]) OR [ALL=코호트])) |

## Research Information Sharing Service (RISS)

| # | Searches                                                                                                                                                                                                                                                                                                                                                                                                                                                                                                                                                        |
|---|-----------------------------------------------------------------------------------------------------------------------------------------------------------------------------------------------------------------------------------------------------------------------------------------------------------------------------------------------------------------------------------------------------------------------------------------------------------------------------------------------------------------------------------------------------------------|
| 1 | 논문명 : "reproductive factor"   "reproductive characteristic"   "reproductive history"   "생식요인"   "생식인자"   "생식특성"   breastfeeding   "breast feeding"   모유   수유   parity   delivery   pregnancy   "age at menarche"   "age at first birth"   "age at last birth"   "age at first birth"   "age at last childbirth"   "number of births"   "number of childbirth"   출산   초산   "출생아수" <AND> 논문명 : cancer   tumor   tumour   neoplasm   malignancy   암   종양 <AND> 논문명 : cohort   "Follow up"   longitudinal   prospective   retrospective   코호트   추적   전향적   후향적   종단 |
| 2 | 초록 : "reproductive factor"   "reproductive characteristic"   "reproductive history"   "생식요인"   "생식인자"   "생식특성"   breastfeeding   "breast feeding"   모유   수유   parity   delivery   pregnancy   "age at menarche"   "age at first birth"   "age at last birth"   "age at first birth"   "age at last childbirth"   "number of births"   "number of childbirth"   출산   초산   "출생아수" <AND> 초록 : cancer   tumor   tumour   neoplasm   malignancy   암   종양 <AND> 초록 : cohort                                                                                           |

|   |                                                                                      |
|---|--------------------------------------------------------------------------------------|
|   | "Follow up"   longitudinal   prospective   retrospective   코호트   추적   전향적   후향적   중단 |
| 3 | 1 OR 2                                                                               |

## Korean Studies Information Service System (KISS)

| # | Searches                                                                                                                      |
|---|-------------------------------------------------------------------------------------------------------------------------------|
| 1 | reproductive   생식   breast feeding   모유   수유   parity   delivery   pregnancy   menarche   birth   childbirth   출산   초산   출생아수 |
| 2 | cancer   tumor   tumour   neoplasm   malignancy   암   종양                                                                      |
| 3 | cohort   Follow up   longitudinal   prospective   retrospective   코호트   추적조사   전향적   후향적   중단                                 |
| 4 | 1 AND 2 AND 3                                                                                                                 |

## Korea Institute of Science and Technology Information (KISTI)

| # | Searches                                                                                                                                                                                                                                                                                                                                                                                                                                                                                                                                         |
|---|--------------------------------------------------------------------------------------------------------------------------------------------------------------------------------------------------------------------------------------------------------------------------------------------------------------------------------------------------------------------------------------------------------------------------------------------------------------------------------------------------------------------------------------------------|
| 1 | 논문명="reproductive factor"   "reproductive characteristic"   "reproductive history"   생식요인   생식인자   생식특성   breastfeeding   "breast feeding"   모유   수유   parity   delivery   pregnancy   "age at menarche"   "age at first birth"   "age at last birth"   "age at first birth"   "age at last childbirth"   "number of births"   "number of childbirth"   출산   초산   출생아수 AND 논문명=cancer*   tumor*   tumour*   neoplasm*   malignan*   암   종양 AND 논문명=cohort   "Follow up"   longitudinal   prospective   retrospective   코호트   추적   전향적   후향적   중단 |
| 2 | 초록="reproductive factor"   "reproductive characteristic"   "reproductive history"   생식요인   생식인자   생식특성   breastfeeding   "breast feeding"   모유   수유   parity   delivery   pregnancy   "age at menarche"   "age at first birth"   "age at last birth"   "age at first birth"   "age at last childbirth"   "number of births"   "number of childbirth"   출산   초산   출생아수 AND 초록=cancer*   tumor*   tumour*   neoplasm*   malignan*   암   종양 AND 초록=cohort   "Follow up"   longitudinal   prospective   retrospective   코호트   추적   전향적   후향적   중단    |
| 3 | 1 OR 2                                                                                                                                                                                                                                                                                                                                                                                                                                                                                                                                           |

## National Assembly Library

| # | Searches                                                                                                                                                                                                                                                                                                   |
|---|------------------------------------------------------------------------------------------------------------------------------------------------------------------------------------------------------------------------------------------------------------------------------------------------------------|
| 1 | "reproductive"   "생식요인"   "생식인자"   "생식특성"   breastfeeding   "breast feeding"   모유   수유   parity   delivery   pregnancy   "age at menarche"   "age at first birth"   "age at last birth"   "age at first birth"   "age at last childbirth"   "number of births"   "number of childbirth"   출산   초산   "출생아수" |
| 2 | cancer*   tumor*   tumour*   neoplasm*   malignan*   암   종양                                                                                                                                                                                                                                                |
| 3 | 1 AND 2                                                                                                                                                                                                                                                                                                    |
